# Supplementary material for: A microfluidic-based platform for tumour spheroid culture, monitoring and drug screening
Source: Royal Society of Chemistry journal article supplement (doi:10.1039/c4lc00291a), 2014-01-01
Supplement: c4lc00291a1.pdf [file c4lc00291a1.pdf]

### Electronic Supplementary Information

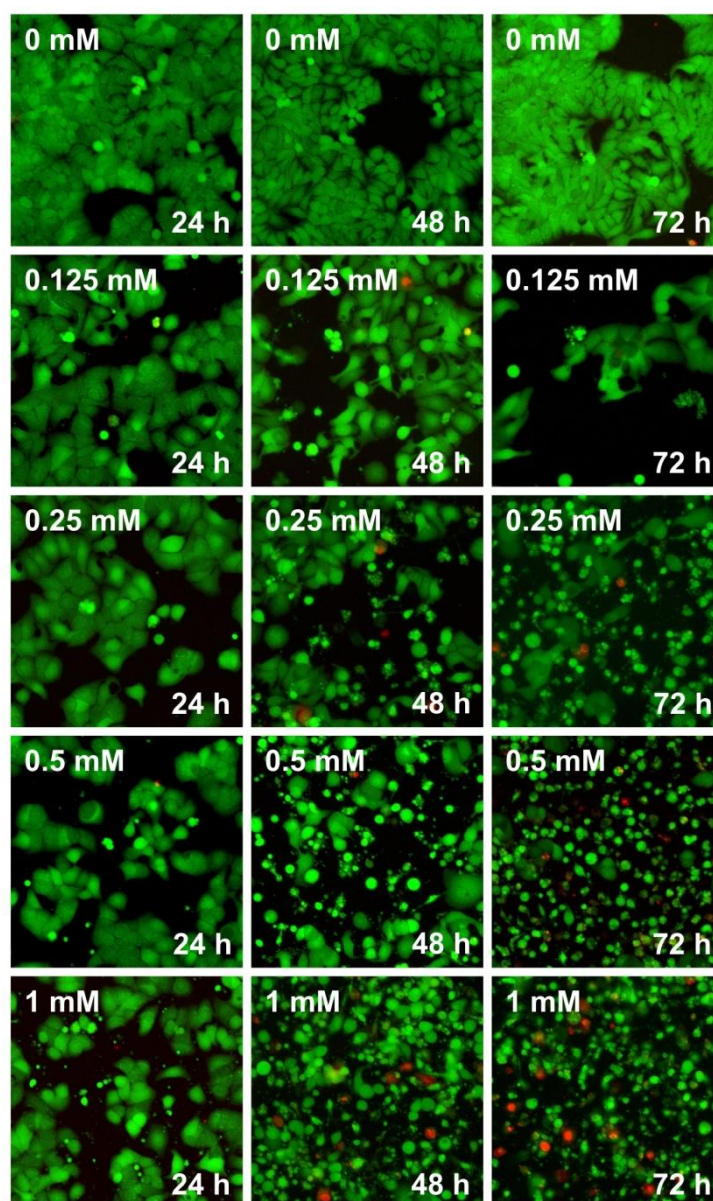

Results of Petri dish experiments on monolayer culture of HT-29 cells. Cells were subjected to 5-Fluorouracil of different concentrations (ranging from 0.125 to 1 mM) for 24 hours. Then, live/dead viability assay was performed. Three dishes were subjected to one 5-FU concentration and each was stained at different day. High sensitivity of HT-29 cells was observed.
